# Supplementary material for: Body mass index and physical activity in seven-year-old children whose mothers exercised during pregnancy: follow-up of a multicentre randomised controlled trial
Source: Springer Nature journal article supplement (doi:10.1186/s12887-021-02952-1), 2021-11-08
Supplement: MOESM1 [file 19845260]

**Table S1a.** Anthropometry and physical activity of girls in the intervention and the control group at 7 years of age.

| Girls                                              | Intervention<br>(n = 68) |            | Control<br>(n = 65) |            | p value |
|----------------------------------------------------|--------------------------|------------|---------------------|------------|---------|
|                                                    | Mean                     | (SD)       | Mean                | (SD)       |         |
| <b>Anthropometry</b>                               |                          |            |                     |            |         |
| Height <sup>a</sup> , cm                           | 126.6                    | (5.2)      | 126.4               | (4.9)      | 0.832   |
| Weight <sup>b</sup> , kg                           | 24.9                     | (3.3)      | 25.0                | (5.3)      | 0.917   |
| BMI <sup>c</sup> , kg/m <sup>2</sup>               | 15.5                     | (1.4)      | 15.5                | (3.3)      | 0.975   |
| Iso-BMI <sup>c</sup> , kg/m <sup>2</sup>           | 19.4                     | (2.5)      | 19.4                | (3.5)      | 0.881   |
| Iso-BMI $\geq 25$ kg/m <sup>2c</sup> , n (%)       | 6                        | (11.1)     | 4                   | (7.8)      | 0.742   |
|                                                    | <b>n</b>                 | <b>(%)</b> | <b>n</b>            | <b>(%)</b> |         |
| <b>Daily amount of MVPA<sup>d</sup></b>            |                          |            |                     |            |         |
| 1 hour or more                                     | 41                       | (60.3)     | 35                  | (55.6)     | 0.583   |
| <b>Frequency of leisure time MVPA</b>              |                          |            |                     |            |         |
| Never                                              | 0                        | (0.0)      | 0                   | (0.0)      |         |
| Once a month or less                               | 3                        | (4.4)      | 0                   | (0.0)      |         |
| Once a week                                        | 16                       | (23.5)     | 22                  | (33.8)     | 0.491   |
| 2 to 3 times a week                                | 38                       | (55.9)     | 35                  | (53.8)     |         |
| 4 to 6 times a week                                | 10                       | (14.7)     | 7                   | (10.8)     |         |
| Every day                                          | 1                        | (1.5)      | 1                   | (1.5)      |         |
| <b>Weekly leisure time MVPA</b>                    |                          |            |                     |            |         |
| None                                               | 4                        | (5.9)      | 1                   | (1.5)      |         |
| 1 hour                                             | 19                       | (27.9)     | 24                  | (36.9)     |         |
| 2 to 3 hours                                       | 36                       | (52.9)     | 31                  | (47.7)     | 0.858   |
| 4 to 6 hours                                       | 9                        | (13.2)     | 8                   | (12.3)     |         |
| 7 hours or more                                    | 0                        | (0.0)      | 1                   | (1.5)      |         |
| <b>Intensity of PA</b>                             |                          |            |                     |            |         |
| Easy                                               | 12                       | (17.6)     | 6                   | (9.2)      |         |
| Out of breath                                      | 56                       | (82.4)     | 57                  | (87.7)     | 0.099   |
| Almost exhausted                                   | 0                        | (0.0)      | 2                   | (3.1)      |         |
| <b>Daily use of electronic devices<sup>e</sup></b> |                          |            |                     |            |         |
| Less than ½ hour                                   | 6                        | (9.0)      | 4                   | (6.2)      |         |
| ½ to 1 hour                                        | 47                       | (70.1)     | 47                  | (72.3)     | 0.753   |
| 2 to 3 hours                                       | 14                       | (20.9)     | 14                  | (21.5)     |         |
| <b>Hours of sleep per weeknight<sup>e</sup></b>    |                          |            |                     |            |         |
| 8 hours or less                                    | 2                        | (3.0)      | 1                   | (1.5)      |         |
| 9 hours                                            | 5                        | (7.5)      | 4                   | (6.2)      |         |
| 10 hours                                           | 41                       | (61.2)     | 44                  | (67.7)     | 0.841   |
| 11 hours                                           | 18                       | (26.9)     | 16                  | (24.6)     |         |
| 12 hours or more                                   | 1                        | (1.5)      | 0                   | (0.0)      |         |

BMI = body mass index; Iso-BMI = BMI adjusted for age and sex; MVPA = moderate to vigorous physical activity; PA = physical activity; SD = standard deviation

<sup>a</sup>Missing data for four girls in the intervention group and five girls in the control group

<sup>b</sup>Missing data for 13 girls in the intervention group and 14 girls in the control group

<sup>c</sup>Missing data for 14 girls in the intervention group and 14 girls in the control group

<sup>d</sup>Missing data for two girls in the control group

<sup>e</sup>Missing data for one girl in the intervention group

**Table S1b.** Anthropometry and physical activity of boys in the intervention and the control group at 7 years of age.

| Boys                                         | Intervention<br>(n = 96) |            | Control<br>(n = 52) |            | p value |
|----------------------------------------------|--------------------------|------------|---------------------|------------|---------|
|                                              | Mean                     | (SD)       | Mean                | (SD)       |         |
| <b>Anthropometry</b>                         |                          |            |                     |            |         |
| Height <sup>a</sup> , cm                     | 127.9                    | (6.1)      | 127.8               | (6.9)      | 0.929   |
| Weight <sup>b</sup> , kg                     | 25.5                     | (4.5)      | 25.6                | (4.3)      | 0.904   |
| BMI <sup>b</sup> , kg/m <sup>2</sup>         | 15.5                     | (1.9)      | 15.6                | (1.6)      | 0.790   |
| Iso-BMI <sup>b</sup> , kg/m <sup>2</sup>     | 19.3                     | (2.9)      | 19.3                | (2.6)      | 0.965   |
| Iso-BMI $\geq$ 25 kg/m <sup>2b</sup> , n (%) | 4                        | (5.1)      | 3                   | (6.5)      | 0.710   |
|                                              | <b>n</b>                 | <b>(%)</b> | <b>n</b>            | <b>(%)</b> |         |
| <b>Daily amount of MVPA</b>                  |                          |            |                     |            |         |
| 1 hour or more                               | 68                       | (70.8)     | 33                  | (63.5)     | 0.358   |
| <b>Frequency of MVPA</b>                     |                          |            |                     |            |         |
| Never                                        | 1                        | (1.0)      | 2                   | (3.8)      |         |
| Once a month or less                         | 1                        | (1.0)      | 1                   | (1.9)      |         |
| Once a week                                  | 17                       | (17.7)     | 11                  | (21.2)     | 0.089   |
| 2 to 3 times a week                          | 55                       | (57.3)     | 32                  | (61.5)     |         |
| 4 to 6 times a week                          | 20                       | (20.8)     | 5                   | (9.6)      |         |
| Every day                                    | 2                        | (2.1)      | 1                   | (1.9)      |         |
| <b>Weekly amount of MVPA</b>                 |                          |            |                     |            |         |
| None                                         | 0                        | (0.0)      | 4                   | (7.7)      |         |
| 1 hour                                       | 32                       | (33.3)     | 12                  | (23.1)     |         |
| 2 to 3 hours                                 | 43                       | (44.8)     | 28                  | (53.8)     | 0.673   |
| 4 to 6 hours                                 | 19                       | (19.8)     | 5                   | (9.6)      |         |
| 7 hours or more                              | 2                        | (2.1)      | 3                   | (5.8)      |         |
| <b>Intensity of PA<sup>c</sup></b>           |                          |            |                     |            |         |
| Easy                                         | 10                       | (10.4)     | 6                   | (11.8)     |         |
| Out of breath                                | 81                       | (84.4)     | 41                  | (80.4)     | 0.982   |
| Almost exhausted                             | 5                        | (5.2)      | 4                   | (7.8)      |         |
| <b>Daily use of electronic devices</b>       |                          |            |                     |            |         |
| Less than ½ hour                             | 7                        | (7.3)      | 5                   | (9.6)      |         |
| ½ to 1 hour                                  | 71                       | (74.0)     | 26                  | (50.0)     | 0.030   |
| 2 to 3 hours                                 | 18                       | (18.8)     | 21                  | (40.4)     |         |
| <b>Amount of sleep per weeknight</b>         |                          |            |                     |            |         |
| 8 hours or less                              | 1                        | (1.0)      | 0                   | (0.0)      |         |
| 9 hours                                      | 8                        | (8.3)      | 6                   | (11.5)     |         |
| 10 hours                                     | 51                       | (53.1)     | 30                  | (57.7)     | 0.441   |
| 11 hours                                     | 35                       | (36.5)     | 15                  | (28.8)     |         |
| 12 hours or more                             | 1                        | (1.0)      | 1                   | (1.9)      |         |

BMI = body mass index; Iso-BMI = BMI adjusted for age and sex; MVPA = moderate to vigorous physical activity; PA = physical activity; SD = standard deviation

<sup>a</sup>Missing data for three boys in the intervention group and four boys in the control group

<sup>b</sup>Missing data for 18 boys in the intervention group and six boys in the control group

<sup>c</sup>Missing data for one boy in the control group
