# Supplementary material for: Body mass index and physical activity in seven-year-old children whose mothers exercised during pregnancy: follow-up of a multicentre randomised controlled trial
Source: Springer Nature journal article supplement (doi:10.1186/s12887-021-02952-1), 2021-11-08
Supplement: MOESM2 [file 19845260]

**Table S2a.** Correlation coefficients for the association of children's iso-BMI and PA with mothers' BMI and PA in the intervention group at the 7-year follow-up.

| Mothers                                      | BMI <sup>c</sup> |       | Daily PA <sup>d</sup> |       | Regular exercise <sup>d</sup> |       | Weekly frequency of exercise <sup>e</sup> |       | Duration of exercise session <sup>e</sup> |       | Intensity of exercise <sup>e</sup> |       | Commuting PA <sup>d</sup> |       |
|----------------------------------------------|------------------|-------|-----------------------|-------|-------------------------------|-------|-------------------------------------------|-------|-------------------------------------------|-------|------------------------------------|-------|---------------------------|-------|
|                                              | r                | p     | r <sub>s</sub>        | p     | r <sub>s</sub>                | p     | r <sub>s</sub>                            | p     | r <sub>s</sub>                            | p     | r <sub>s</sub>                     | p     | r <sub>s</sub>            | p     |
| Children                                     |                  |       |                       |       |                               |       |                                           |       |                                           |       |                                    |       |                           |       |
| Iso-BMI <sup>a</sup>                         | 0.208            | 0.019 |                       |       |                               |       |                                           |       |                                           |       |                                    |       |                           |       |
| Daily MVPA                                   | -                | -     | 0.126                 | 0.108 | 0.070                         | 0.376 | 0.075                                     | 0.430 | 0.036                                     | 0.701 | 0.232                              | 0.013 | 0.073                     | 0.353 |
| Frequency of leisure time MVPA               | -                | -     | 0.105                 | 0.181 | 0.014                         | 0.855 | 0.014                                     | 0.882 | -0.066                                    | 0.482 | 0.014                              | 0.886 | 0.042                     | 0.597 |
| Weekly leisure time MVPA                     | -                | -     | 0.117                 | 0.137 | -0.060                        | 0.450 | 0.021                                     | 0.822 | 0.003                                     | 0.974 | 0.091                              | 0.338 | -0.045                    | 0.572 |
| Intensity of PA                              | -                | -     | -0.075                | 0.339 | -0.006                        | 0.942 | 0.062                                     | 0.513 | -0.004                                    | 0.969 | 0.204                              | 0.029 | 0.088                     | 0.266 |
| Daily use of electronic devices <sup>b</sup> | -                | -     | -0.038                | 0.632 | -0.137                        | 0.083 | 0.008                                     | 0.933 | -0.030                                    | 0.755 | 0.048                              | 0.612 | -0.004                    | 0.964 |

BMI = body mass index; Iso-BMI = BMI adjusted for age and sex; MVPA = moderate to vigorous physical activity; PA = physical activity; Regular exercise = weekly physical activity to maintain or improve physical fitness; r = Pearson correlation coefficient; r<sub>s</sub> = Spearman correlation coefficient

<sup>a</sup>Missing data for 32 children in the intervention group

<sup>b</sup>Missing data for one child in the intervention group

<sup>c</sup>Missing data for nine mothers in the intervention group

<sup>d</sup>Missing data for one mother in the intervention group

<sup>e</sup>Answers requested only for mothers reporting regular exercise (n=114 in the intervention group)

**Table S2b.** Correlation coefficients for the association of children's iso-BMI and PA with mothers' BMI and PA in the control group at the 7-year follow-up.

| Mothers                         | BMI <sup>d</sup> |       | Daily PA       |       | Regular exercise |       | Weekly frequency of exercise |       | Duration of exercise session |       | Intensity of exercise |       | Commuting PA   |       |
|---------------------------------|------------------|-------|----------------|-------|------------------|-------|------------------------------|-------|------------------------------|-------|-----------------------|-------|----------------|-------|
|                                 | r                | p     | r <sub>s</sub> | p     | r <sub>s</sub>   | p     | r <sub>s</sub>               | p     | r <sub>s</sub>               | p     | r <sub>s</sub>        | p     | r <sub>s</sub> | p     |
| Children                        |                  |       |                |       |                  |       |                              |       |                              |       |                       |       |                |       |
| Iso-BMI <sup>a</sup>            | 0.304            | 0.003 |                |       |                  |       |                              |       |                              |       |                       |       |                |       |
| Daily MVPA <sup>c</sup>         | -                | -     | 0.082          | 0.384 | 0.024            | 0.797 | 0.087                        | 0.460 | 0.156                        | 0.180 | -0.026                | 0.825 | 0.039          | 0.682 |
| Frequency of leisure time MVPA  | -                | -     | 0.143          | 0.125 | 0.110            | 0.237 | 0.214                        | 0.063 | 0.184                        | 0.112 | 0.234                 | 0.042 | 0.067          | 0.475 |
| Weekly leisure time MVPA        | -                | -     | 0.154          | 0.097 | 0.121            | 0.194 | 0.168                        | 0.147 | 0.213                        | 0.065 | 0.133                 | 0.252 | 0.002          | 0.979 |
| Intensity of PA <sup>b</sup>    | -                | -     | 0.034          | 0.714 | 0.044            | 0.640 | -0.016                       | 0.888 | 0.040                        | 0.734 | 0.230                 | 0.046 | 0.006          | 0.945 |
| Daily use of electronic devices | -                | -     | -0.066         | 0.479 | 0.038            | 0.680 | -0.010                       | 0.929 | 0.125                        | 0.283 | 0.023                 | 0.844 | -0.021         | 0.823 |

BMI = body mass index; Iso-BMI = BMI adjusted for age and sex; MVPA = moderate to vigorous physical activity; PA = physical activity; Regular exercise = weekly physical activity to maintain or improve physical fitness; r = Pearson correlation coefficient; r<sub>s</sub> = Spearman correlation coefficient

<sup>a</sup>Missing data for children in the control group

<sup>b</sup>Missing data for one child in the control group

<sup>c</sup>Missing data for two children in the control group

<sup>d</sup>Missing data for five mothers in the control group

<sup>e</sup>Answers requested only for mothers reporting regular exercise (n=76 in the control group)
